# Supplementary material for: A FRET-based rhodamine–benzimidazole conjugate as a Cu2+-selective colorimetric and ratiometric fluorescence probe that functions as a cytoplasm marker
Source: Royal Society of Chemistry journal article supplement (doi:10.1039/c3ra46280c), 2013-11-19

**Supporting Information**

**FRET based rhodamine-benzimidazole conjugate as Cu<sup>2+</sup> selective colorimetric and ratiometric fluorescence probe with its function as cytoplasm marker**

Shyamaprosad Goswami <sup>\*a</sup>, Sibaprasad Maity <sup>a,b</sup>, Annada C Maity<sup>a</sup>, Anup Kumar Maity<sup>c</sup>, Avijit kumar Das <sup>a</sup>, Partha Saha<sup>c</sup>.

| <b>CONTENT</b>                                                                                                                           | <b><i>Page</i></b> |
|------------------------------------------------------------------------------------------------------------------------------------------|--------------------|
| <b>1. General .....</b>                                                                                                                  | <b>2</b>           |
| <b>2. General methods of UV-vis and fluorescence titration experiments .....</b>                                                         | <b>2</b>           |
| <b>3. Job plot analysis .....</b>                                                                                                        | <b>2</b>           |
| <b>4. Association constant determination and detection limit determination .....</b>                                                     | <b>3</b>           |
| <b>5. Procedure for the preparation of RBC and its spectroscopic characterization ( <sup>1</sup>H NMR, <sup>13</sup>C and Mass).....</b> | <b>4-7</b>         |
| <b>6. Fluorescence titration spectra of RBC with different metal ions.....</b>                                                           | <b>9-10</b>        |
| <b>7. UV-vis titration spectra of RBC with different metal ions.....</b>                                                                 | <b>11-12</b>       |

## 1. General:

The chemicals and solvents were purchased from Sigma-Aldrich Chemicals Private Limited and were used without further purification. Melting points were determined on a hot-plate melting point apparatus in an open-mouth capillary and were uncorrected.  $^1\text{H}$ -NMR and  $^{13}\text{C}$  NMR spectra were recorded on Bruker 400 MHz instruments. For NMR spectra,  $\text{CDCl}_3$  was used as solvent with TMS as an internal standard. Chemical shifts are expressed in  $\delta$  units and  $^1\text{H}$ - $^1\text{H}$  and  $^1\text{H}$ - $^{13}\text{C}$  coupling constants in Hz. UV-vis titration experiments were performed on a JASCO UV-V530 spectrophotometer and fluorescence experiment was done using PerkinElmer LS 55 fluorescence spectrophotometer with a fluorescence cell of 10 mm path.

## 2. General method of Uv-vis and fluorescence titrations:

For UV-vis and fluorescence titrations, stock solution of the RBC was prepared ( $c = 1 \times 10^{-5} \text{ ML}^{-1}$ ) in  $\text{CH}_3\text{CN}$ /aqueous HEPES buffer solution (8:2, v/v, pH 7.4). The solution of the guest metal ions like  $\text{Cr}^{3+}$ ,  $\text{Ni}^{2+}$ ,  $\text{Cu}^{2+}$ ,  $\text{Pb}^{2+}$ ,  $\text{Co}^{2+}$ ,  $\text{Mn}^{2+}$ ,  $\text{Cd}^{2+}$ ,  $\text{Fe}^{2+}$ ,  $\text{Zn}^{2+}$ ,  $\text{Hg}^{2+}$  using their chloride salts were prepared ( $c = 2 \times 10^{-4} \text{ ML}^{-1}$ ) in  $\text{CH}_3\text{CN}$ . The original volume of the RBC solution was 2 ml. Solutions of the RBC of various concentrations and increasing concentrations of metal ions were prepared separately. Then the absorption and fluorescence sensing of metal ions were recorded.

## 3. General procedure for drawing Job plot by UV-vis method:

Stock solution of same concentration of RBC in  $\text{CH}_3\text{CN}$ - HEPES buffer solution (10 mM HEPES, 8:2, v/v, pH 7.4) and  $\text{Cu}^{2+}$  were prepared in the order of  $1.0 \times 10^{-5} \text{ M}$  in pure  $\text{CH}_3\text{CN}$ . The absorbance in each case with different *host-guest* ratio but equal in volume was recorded. Job plots were drawn by plotting  $\Delta I \cdot X_{\text{host}}$  vs  $X_{\text{host}}$  ( $\Delta I$  = change of intensity of the absorbance spectrum during titration and  $X_{\text{host}}$  is the mole fraction of the host in each case, respectively).

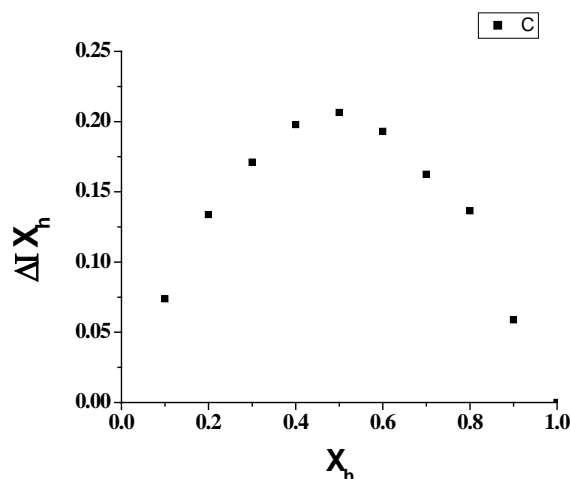

Fig-S1: Jobs plot diagram of RBC for  $\text{Cu}^{2+}$ .

## 4. Association constant determination using fluorescence titration:

The binding constant value of  $\text{Cu}^{2+}$  with RBC has been determined from the emission intensity data following the modified Benesi-Hildebrand equation,  $1/\Delta I = 1/\Delta I_{\text{max}} + (1/K[C]) (1/\Delta I_{\text{max}})$ . Here  $\Delta I = I - I_{\text{min}}$  and  $\Delta I_{\text{max}} = I_{\text{max}} - I_{\text{min}}$ , where  $I_{\text{min}}$ ,  $I$  and  $I_{\text{max}}$  are the emission intensities of RBC considered in the absence of  $\text{Cu}^{2+}$ , at an intermediate  $\text{Cu}^{2+}$  concentration and at a concentration of complete saturation where  $K$  is the binding constant and  $[C]$  is the

$\text{Cu}^{2+}$  concentration respectively. From the plot of  $1/(I-I_{\min})$  against  $[C]^{-1}$  for RBC, the value of K has been determined from the slope. The association constant ( $K_a$ ) as determined by fluorescence titration method for RBC with  $\text{Cu}^{2+}$  is found to be  $1.5 \times 10^4 \text{ M}^{-1}$ .

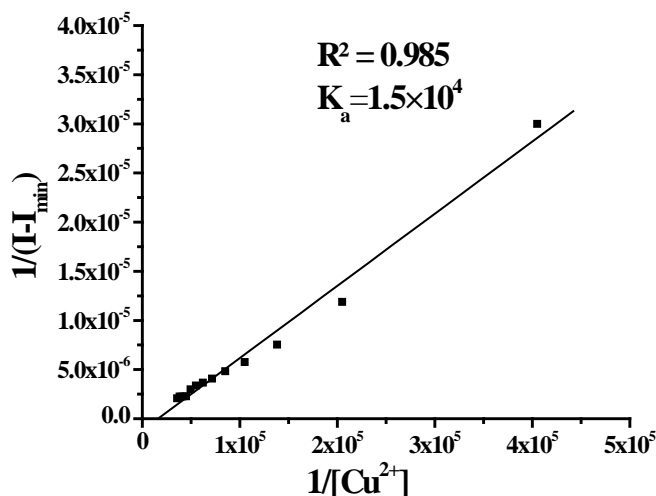

**Fig. S<sub>2</sub>:** Benesi–Hildebrand plot from fluorescence titration data of **RBC** ( $c = 1 \times 10^{-5} \text{ M}$ ) with  $\text{Cu}^{2+}$  ( $c = 2 \times 10^{-4} \text{ M}$ ).

#### 5. Calculation of the detection limit:

The detection limit (DL) of **RBC** in emission spectra for  $\text{Cu}^{2+}$  was determined from the following equation<sup>1</sup>:

$$\text{DL} = K * \text{Sb1}/S$$

Where  $K = 2$  or  $3$  (we take  $3$  in this case); Sb1 is the standard deviation of the blank solution;  $S$  is the slope of the calibration curve.

From the graph Fig.S<sub>3</sub>, we get slope = 18105, and Sb1 value is 18798.

Thus using the formula we get the Detection Limit for  $\text{Cu}^{2+} = 3.1 \text{ } \mu\text{M}$  in Fluorescence spectra.

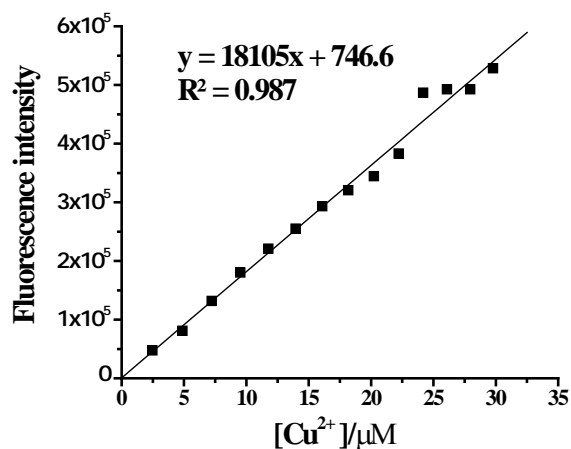

**Fig. S<sub>3</sub>** Changes of Fluorescence Intensity of **RBC** ( $c = 1 \times 10^{-5} \text{ M}$ ) as a function of  $[\text{Cu}^{2+}]$  ( $c = 2 \times 10^{-4} \text{ M}$ ) at 580 nm.

**Ref.1:** Zhu, M.; Yuan, M.; Liu, X.; Xu, J.; Lv, J.; Huang, C.; Liu, H.; Li, Y.; Wang, S.; Zhu, D. *Org. Lett.* **2008**, *10*, 1481-1484.

## 6. Methods for the preparation of RBC:

### a) Synthesis of 2-amino-3',6'-bis(diethylamino)spiro[isindoline-1,9'-xanthen]-3-one (**1**)

Rhodamine B (**1**) (1.0 g, 2.1 mmol), 80% hydrazine hydrate (2.7 g, 43 mmol) and EtOH (12 mL) were added to a flask, stirred and heated to reflux for 3 h, and then water (40 mL) added to the mixture. The mixture was extracted with ethyl acetate (40 mL) three times. The combined organic layer was dried over anhydrous magnesium sulfate and then filtered. The filtrate was concentrated to give product (**1**)

### b) Synthesis of 2-chloromethyl-1-methyl-1*H*-benzimidazole (**2**)

2-Chloromethyl benzimidazole (**2**) was prepared by condensation of commercially available N-methyl-1,2-phenylenediamine with chloroacetic acid in the presence of hydrochloric acid. (Ref: *Synthetic Communications*, 2013, **43**, 1882–1895)

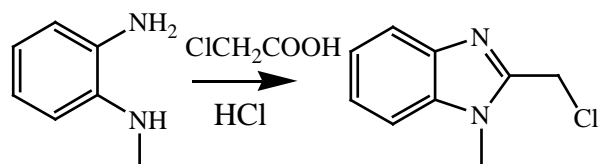

### c) Synthesis of RBC

2-amino-3',6'-bis(diethylamino)spiro[isindoline-1,9'-xanthen]-3-one (**1**) (500 mg, 1.1 mmol) and 2-chloromethyl-1-methyl-1*H*-benzimidazole (**2**) were refluxed in dry THF in presence of Et<sub>3</sub>N for two days. The mixture was extracted with chloroform. The combined organic layer was dried over anhydrous magnesium sulfate and then filtered. The filtrate was concentrated and purified through column chromatography using 10% CH<sub>3</sub>OH in CHCl<sub>3</sub> as 72% yield

<sup>1</sup>H NMR (CDCl<sub>3</sub>, 400 MHz): δ (ppm): 7.93 (s, 2H), 7.41 (s, 4H), 7.08 (s, 2H), 6.45(d, 7H, *J* = 8.00 Hz), 6.28 (d, 3H, *J*= 8.00 Hz), 3.62 (s, 4H), 3.32 (s, 14H), 1.16 (s, 12 H).

<sup>13</sup>C NMR(CDCl<sub>3</sub>, 100 MHz):δ (ppm): 166.05, 153.84, 151.58, 148.84, 132.48, 130.03, 128.04, 123.50, 122.90, 108.01, 104.63, 98.00, 65.86, 44.35, 12.62.

HRMS (M + H<sup>+</sup>): calcd for 745.2978, found 745.2430.

Anal calcd for C<sub>46</sub>H<sub>48</sub>N<sub>8</sub>O<sub>2</sub>: 74.17% C, 6.49% H, 15.05% N, and 4.30% O; found: 74.26% C, 6.90% H, 15.18% N, and 4.68% O.

7. a)  $^1\text{H}$  NMR spectrum of RBC in  $\text{CDCl}_3$  (400 MHz):

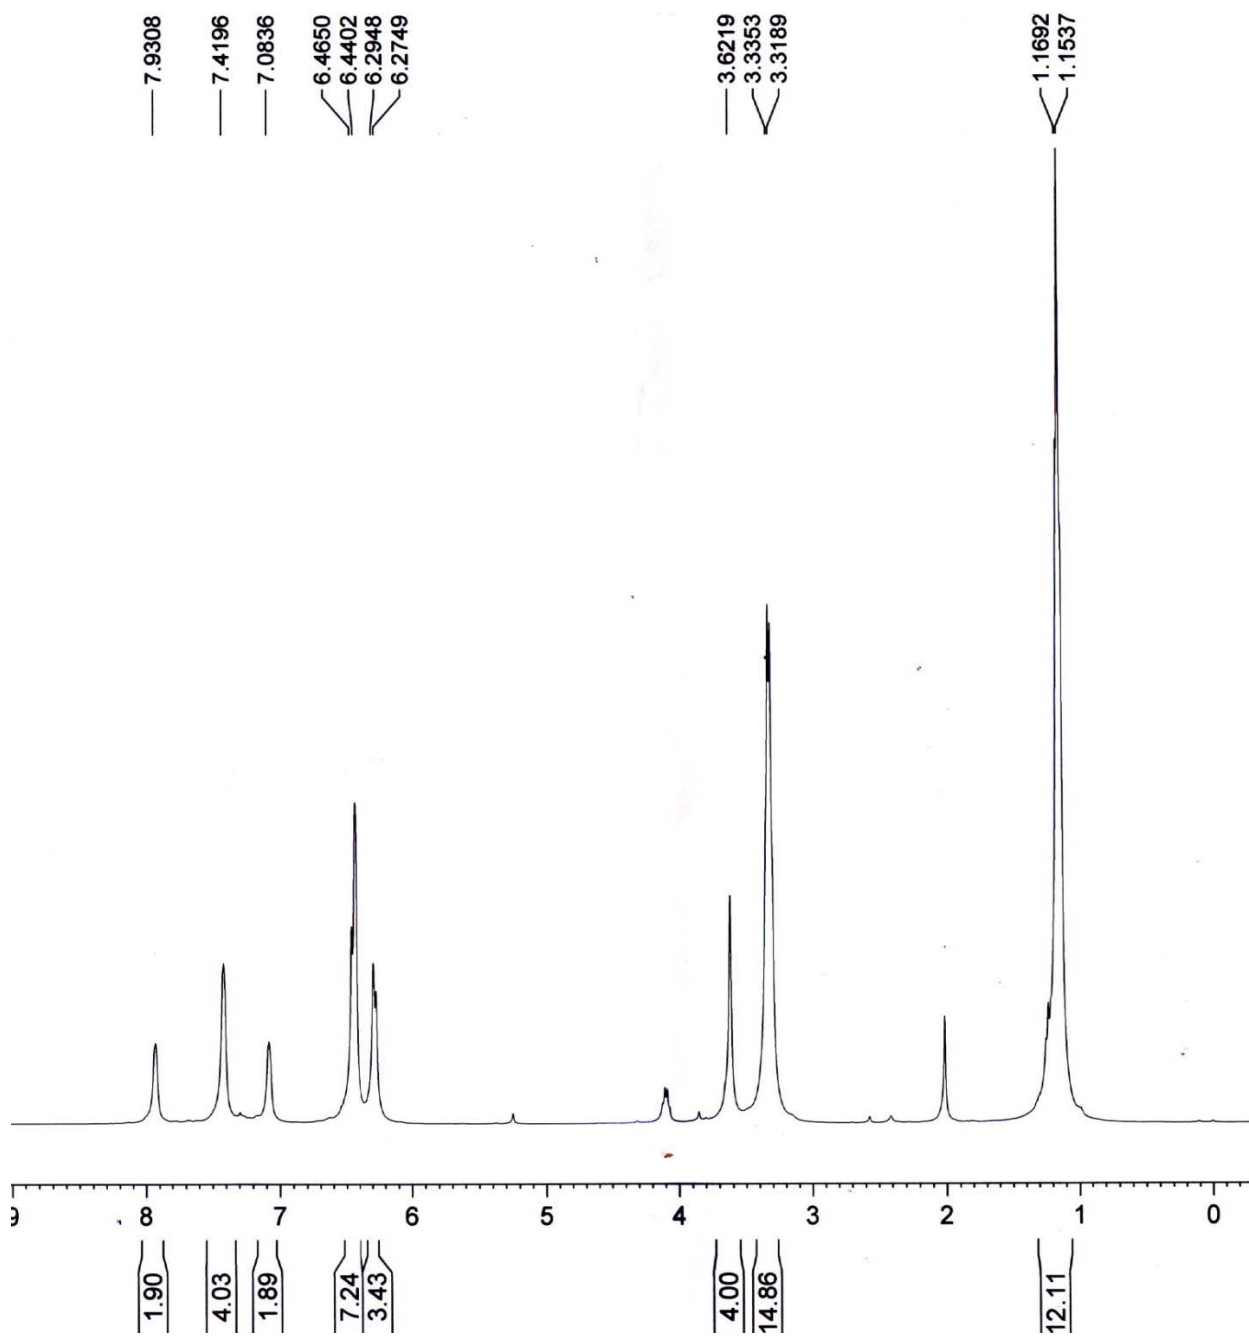



c) Mass spectra of RBC:

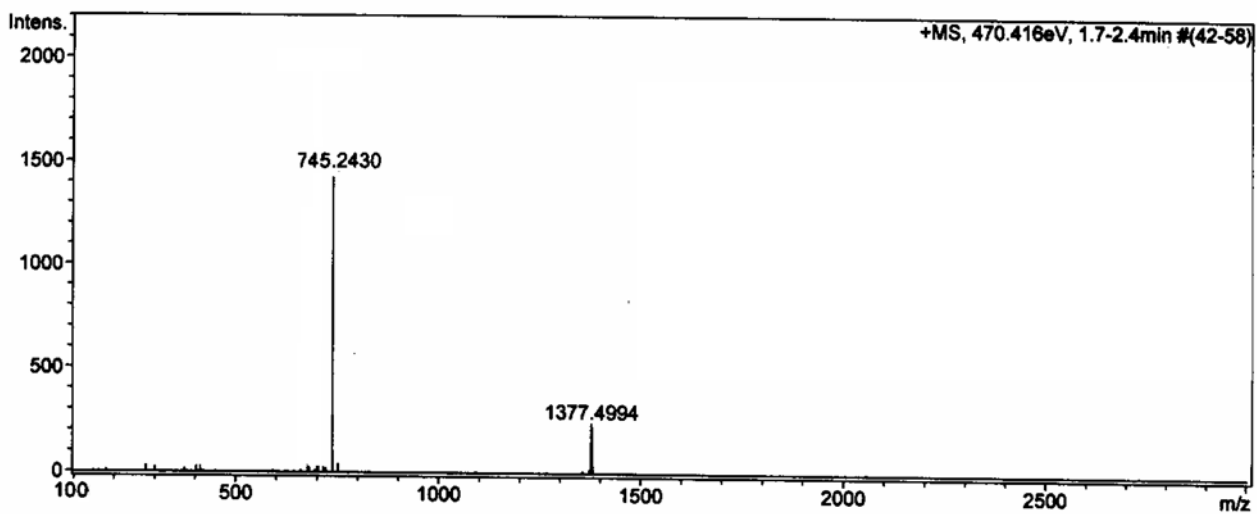

**d) ESI mass spectra of Cu-complex with RBC:  $[C_{48}H_{51}CuN_9O_2 + 2H]^{2+} = 425$**

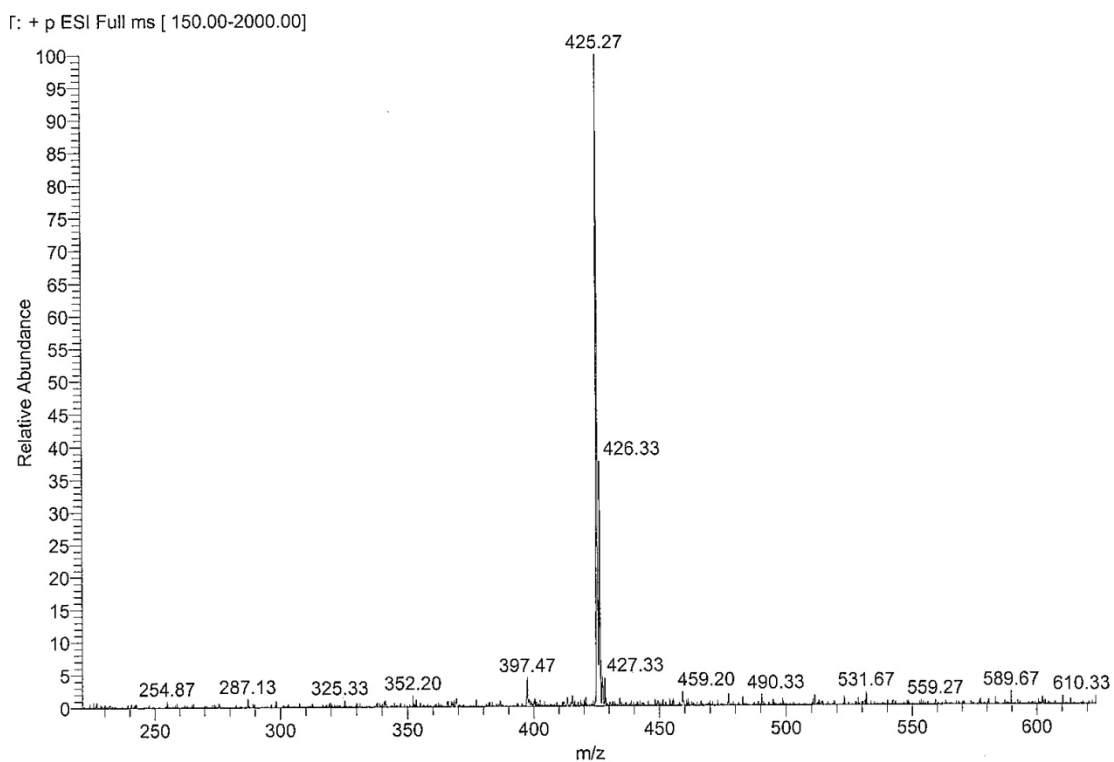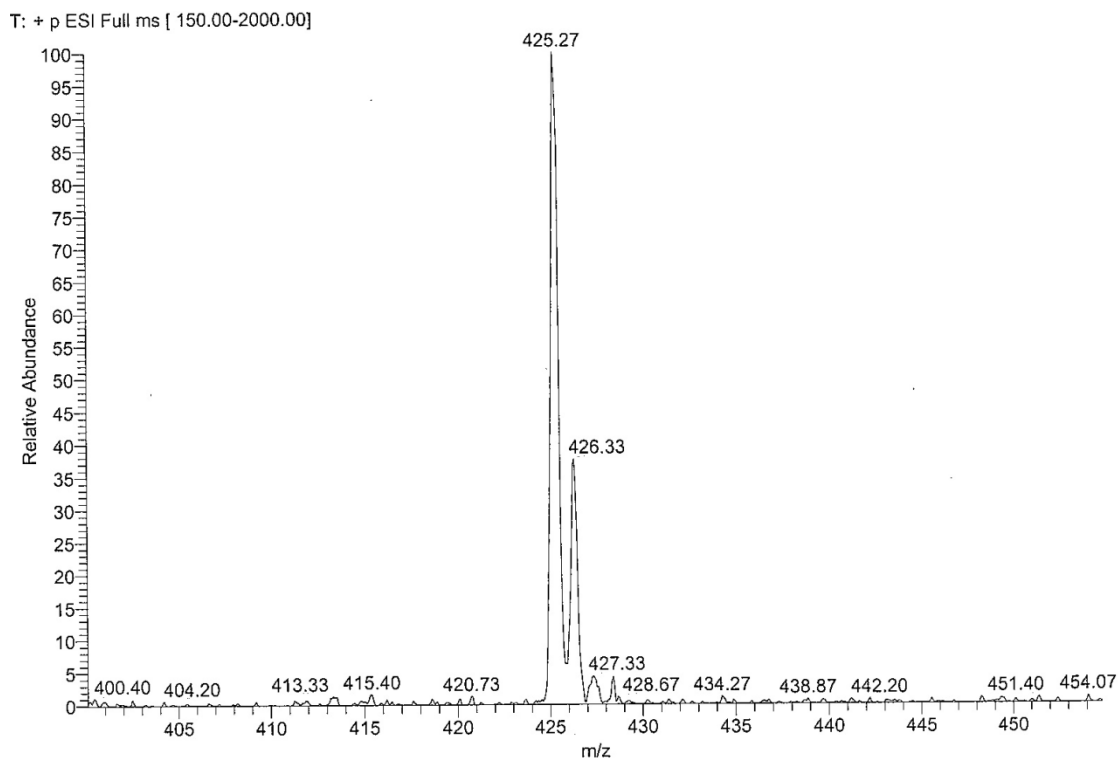

# 8. Fluorescence spectra of RBC with different guest metal ions in acetonitrile-HEPES buffer (pH 7.4)

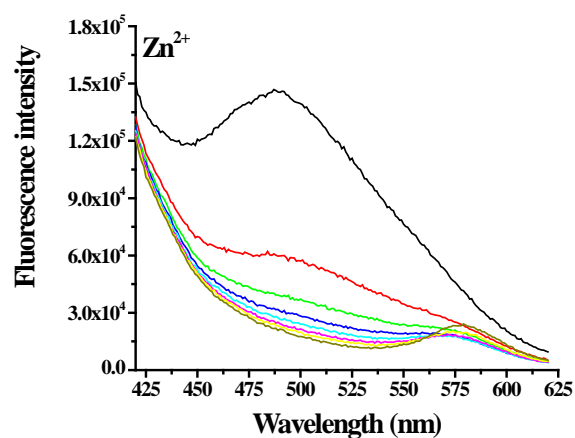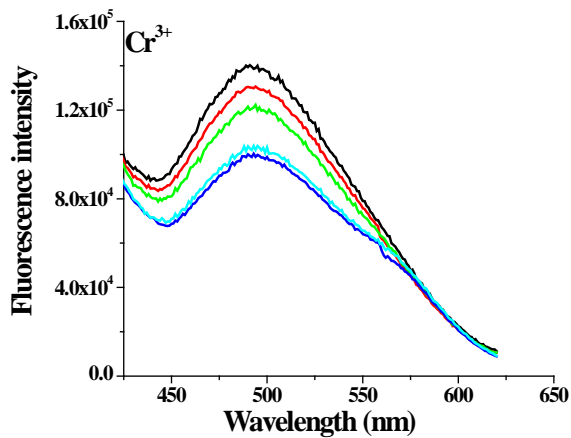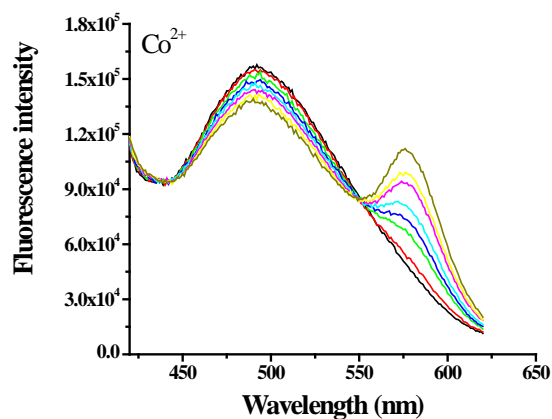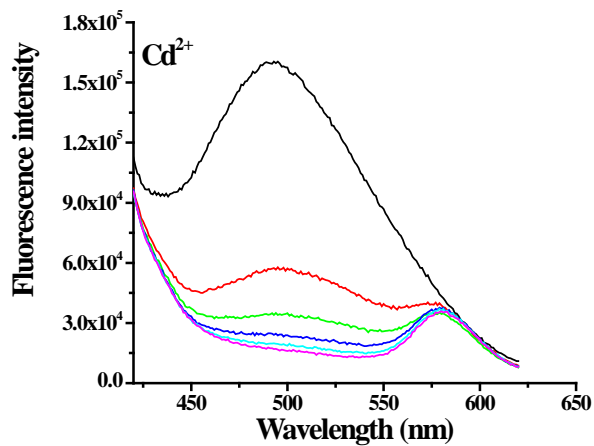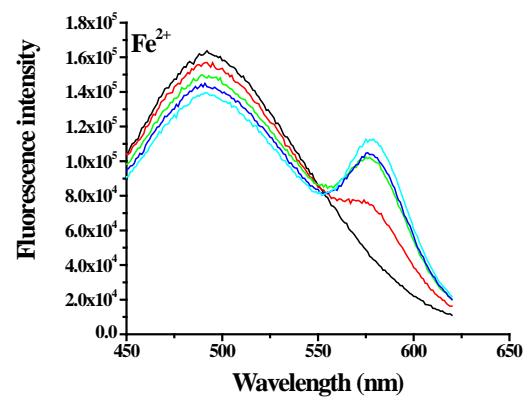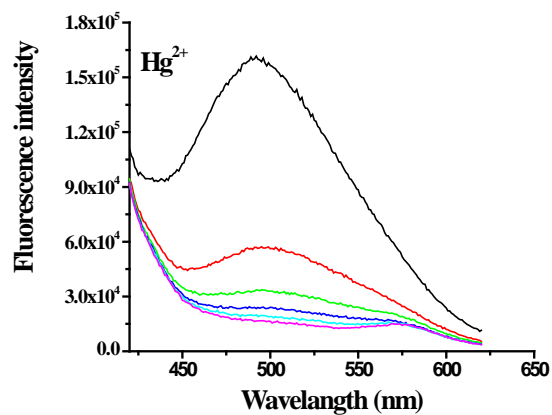

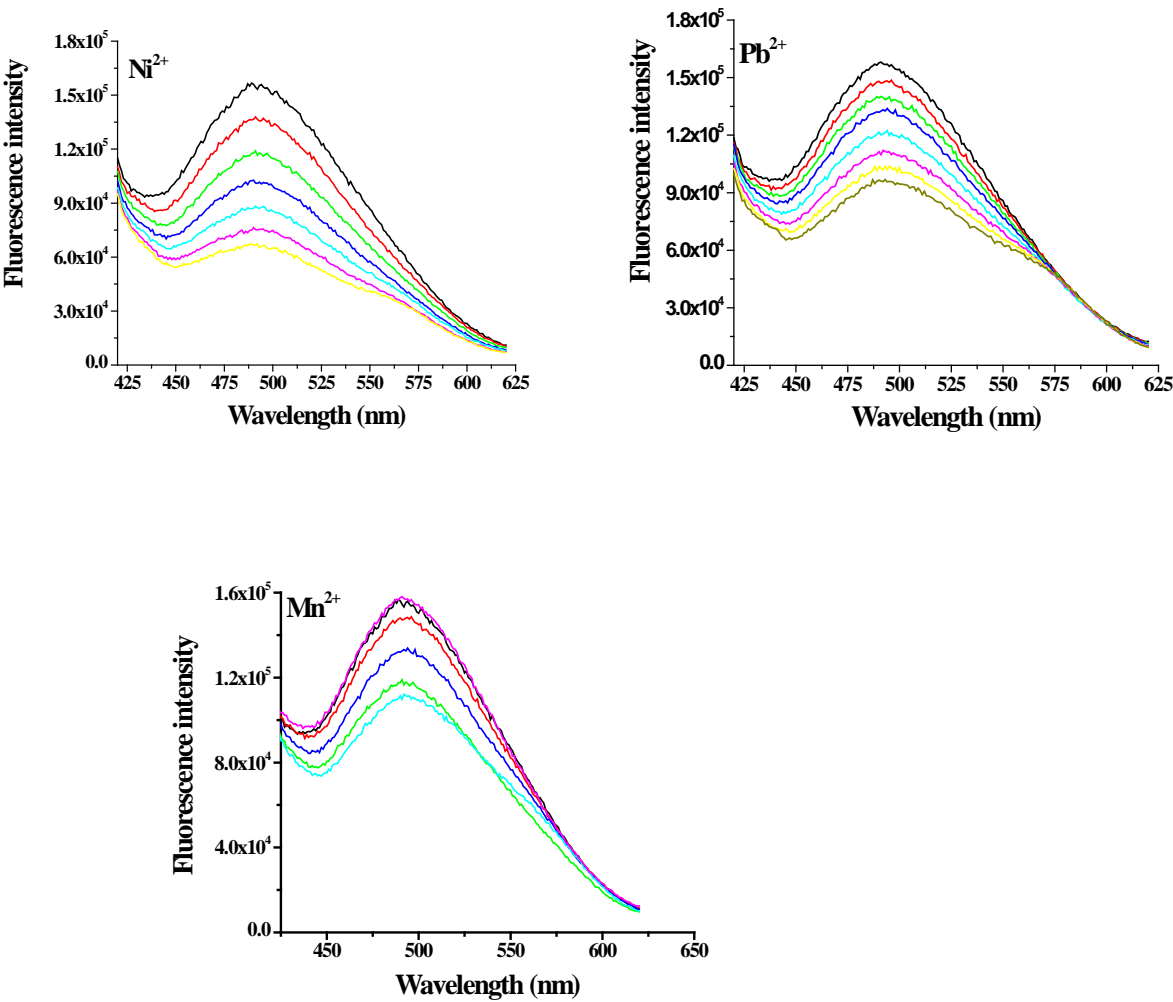

9. UV-vis spectra of RBC with different guest metal ions in acetonitrile-HEPES buffer (pH 7.4)

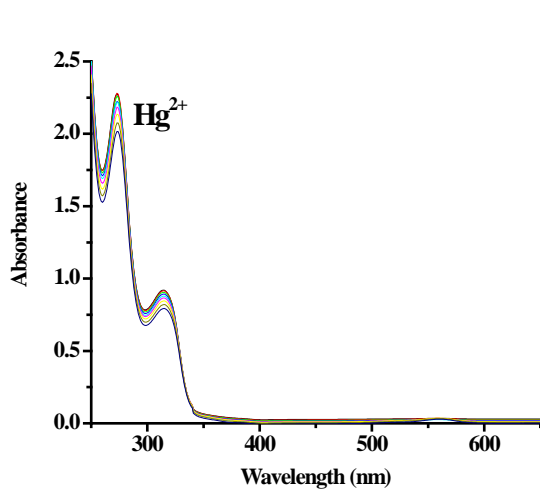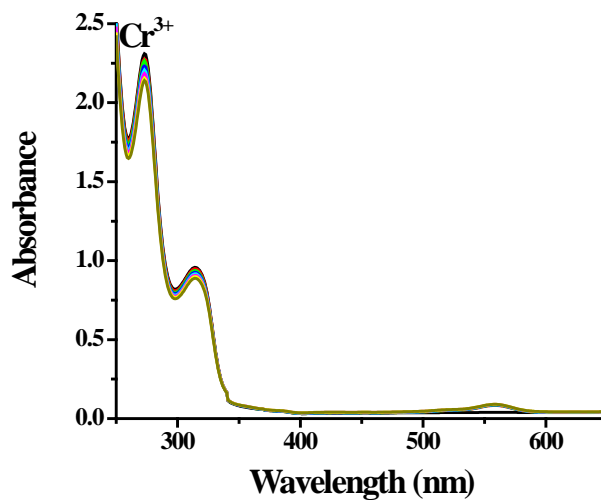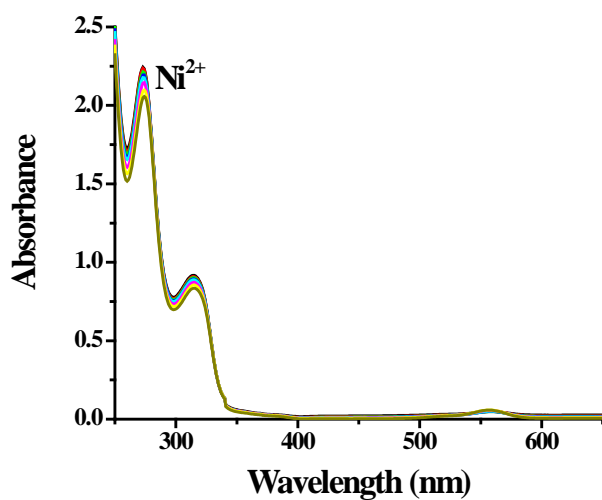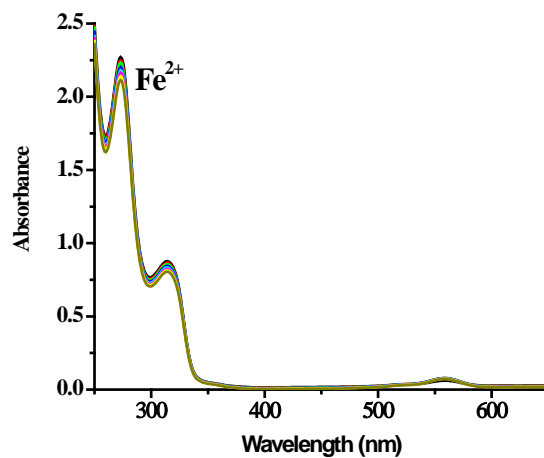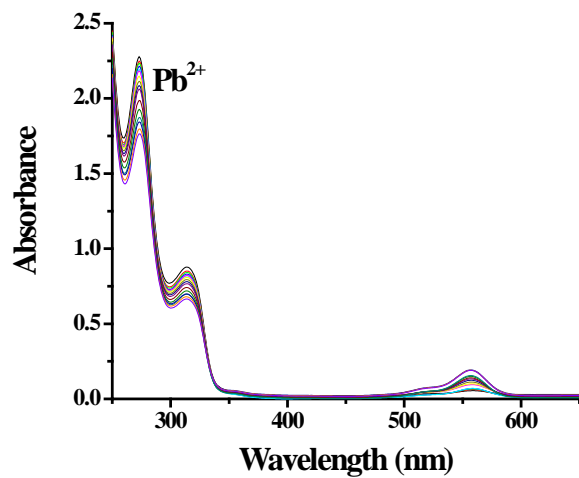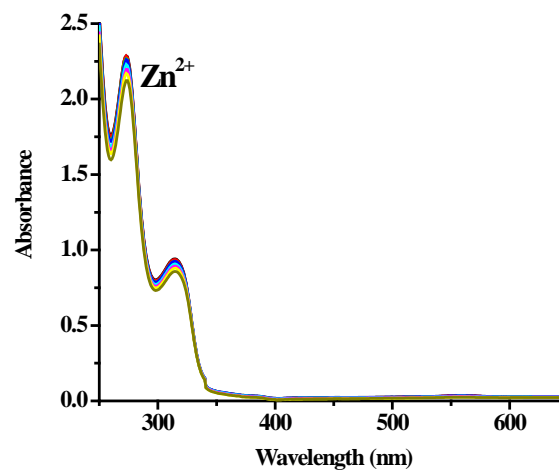

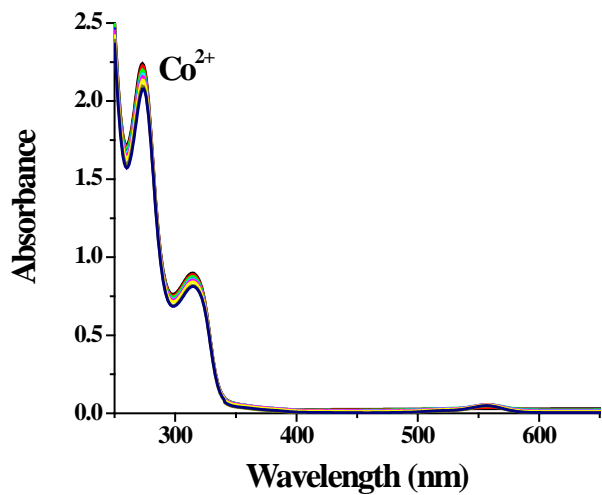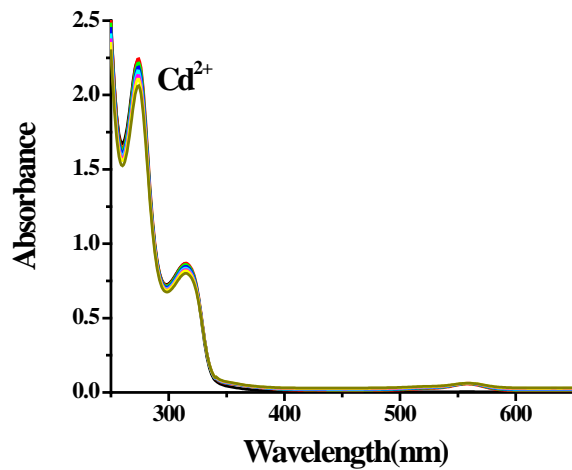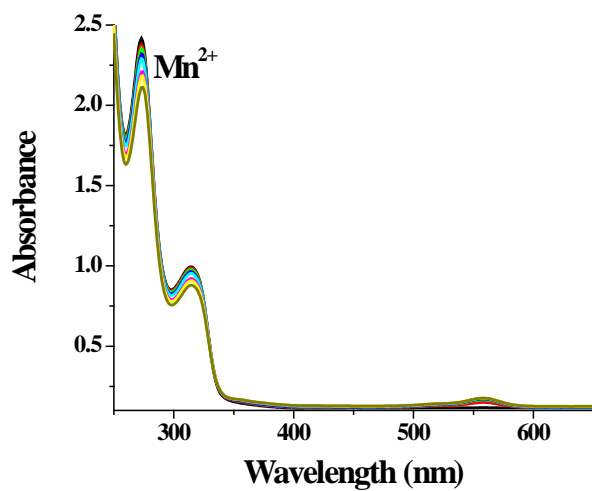

Supplement: c3ra46280c.pdf [file c3ra46280c.pdf]
